# Supplementary material for: Noncovalent functionalization of graphene with end-functional polymers
Source: Royal Society of Chemistry journal article supplement (doi:10.1039/b919074k), 2010-01-01
Supplement: b919074k.pdf [file b919074k.pdf]

**Electronic Supplementary Information (ESI) for**

# Noncovalent Functionalization of Graphene with End-Functional Polymers

*Eun-Young Choi,<sup>†,§</sup> Tae Hee Han,<sup>†</sup> Ji Hyun Hong,<sup>†</sup> Ji Eun Kim,<sup>†</sup> Sun Hwa Lee<sup>†</sup>, Hyun*

*Wook Kim,<sup>†</sup> and Sang Ouk Kim<sup>\*,†</sup>*

Department of Materials Science and Engineering, Korea Advanced Institute of Science  
and Technology, Daejeon 305-701, Republic of Korea and Nuclear Fuel Cycle Group,  
Korea Atomic Energy Research Institute, Daejeon 305-353, Republic of Korea

\* Corresponding author.

<sup>†</sup>Department of Materials Science and Engineering, Korea Advanced Institute of  
Science and Technology

<sup>§</sup>Nuclear Fuel Cycle Group, Korea Atomic Energy Research Institute

### **Characterization of graphene oxide and reduced graphene – FTIR spectra**

Figure S1 shows FTIR spectra of graphite, graphene oxide and reduced graphene. While no significant peak was found in graphite, the presence of different type of oxygen functionalities in graphene oxide was confirmed at  $3400\text{ cm}^{-1}$  (O–H stretching vibrations), at  $1720\text{ cm}^{-1}$  (stretching vibrations from C=O), at  $1600\text{ cm}^{-1}$  (skeletal vibrations from unoxidized graphitic domains), at  $1220\text{ cm}^{-1}$  (C–OH stretching vibrations), and at  $1060\text{ cm}^{-1}$  (C–O stretching vibrations) [Xu, Y. et al, *J. Am. Chem. Soc.* 2008, 130, 5856]. FTIR peak of reduced graphene presents that O–H stretching vibrations observed at  $3400\text{ cm}^{-1}$  was significantly reduced due to deoxygenation. However, stretching vibrations from C=O at  $1720\text{ cm}^{-1}$  were still observed and C–O stretching vibrations at  $1060\text{ cm}^{-1}$  became sharper, which were caused by remaining carboxyl groups even after hydrazine reduction [Li, D. et al., *Nature Nanotechnol.* 2008, 3, 101].

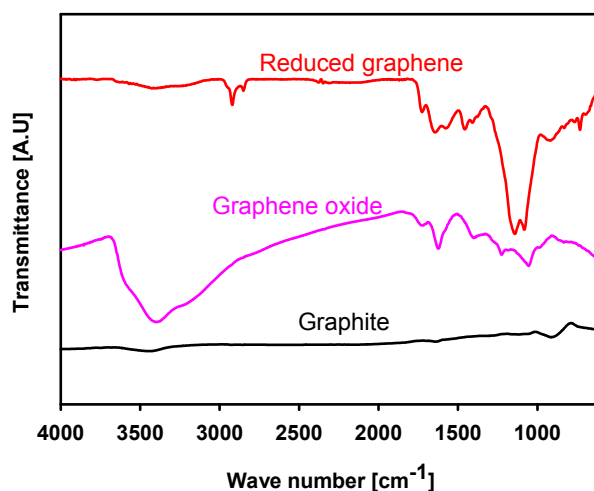

Figure S1. FTIR spectra of graphite, graphene oxide and reduced graphene.

### **Characterization of graphene oxide and reduced graphene – UV-Vis spectroscopy**

As shown in Figure S2, the absorption peak at 230 nm red-shifted to 270 nm, indicating that the electronic conjugation within the reduced graphene sheets was revived upon reduction of graphene oxide [Li, D. et al., *Nature Nanotechnol.* 2008, 3, 101].

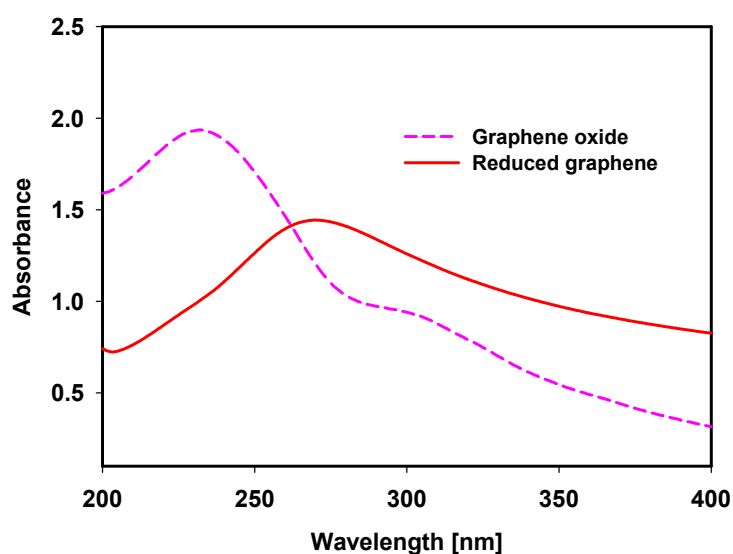

Figure S2. UV-Vis absorption spectra of graphene oxide (0.03 mg/ml) and reduced graphene (0.01 mg/ml).

### **Characterization of graphene oxide and reduced graphene – Thermogravimetric analysis (TGA)**

Thermogravimetric analysis (TGA) of graphite, graphene oxide and reduced graphene was carried out under N<sub>2</sub> flow using TA Instrument Thermogravimetric Analyzer Q50 (USA) and their masses were recorded as a function of temperature. The samples were heated from room temperature to 600 °C at 5 °C/min. The results are shown in Figure S3. As expected, graphite was highly stable up to 600 °C. Graphene oxide shows slight

mass decrease from room temperature to 150 °C and significant decrease from 150 °C to 200 °C. The mass of graphene oxide slowly further decreased up to 600 °C. The major mass reduction at ~ 200 °C was caused by pyrolysis of the oxygen-containing functional groups, generating CO, CO<sub>2</sub> and steam [Lerf, A. et al. *J. Phys. Chem. B.* 1998, 102, 4477]. On the other hand, reduced graphene showed an enhanced thermal stability due to the removal of oxygen-containing functional groups by hydrazine reduction [Stankovich, S. et al. *Carbon*, 2007, 45, 1558].

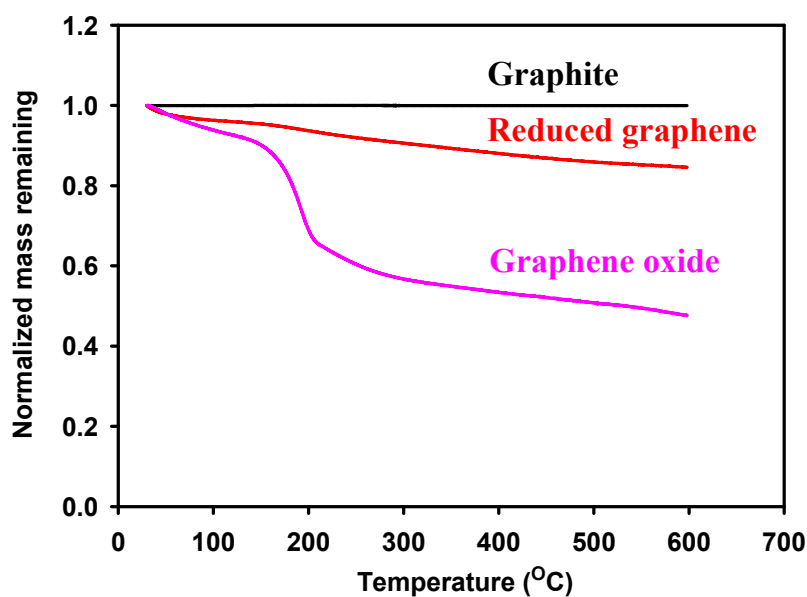

Figure S3. Normalized TGA plots for graphite, graphene oxide and reduced graphene.
